# Supplementary figures and images for: Cell-free DNA from bile outperformed plasma as a potential alternative to tissue biopsy in biliary tract cancer
Source: PubMed Central journal article supplement — ESMO Open. 2021 Oct 12;6(6):100275. doi: 10.1016/j.esmoop.2021.100275 (PMC8517551; doi:10.1016/j.esmoop.2021.100275), 2021-10-12

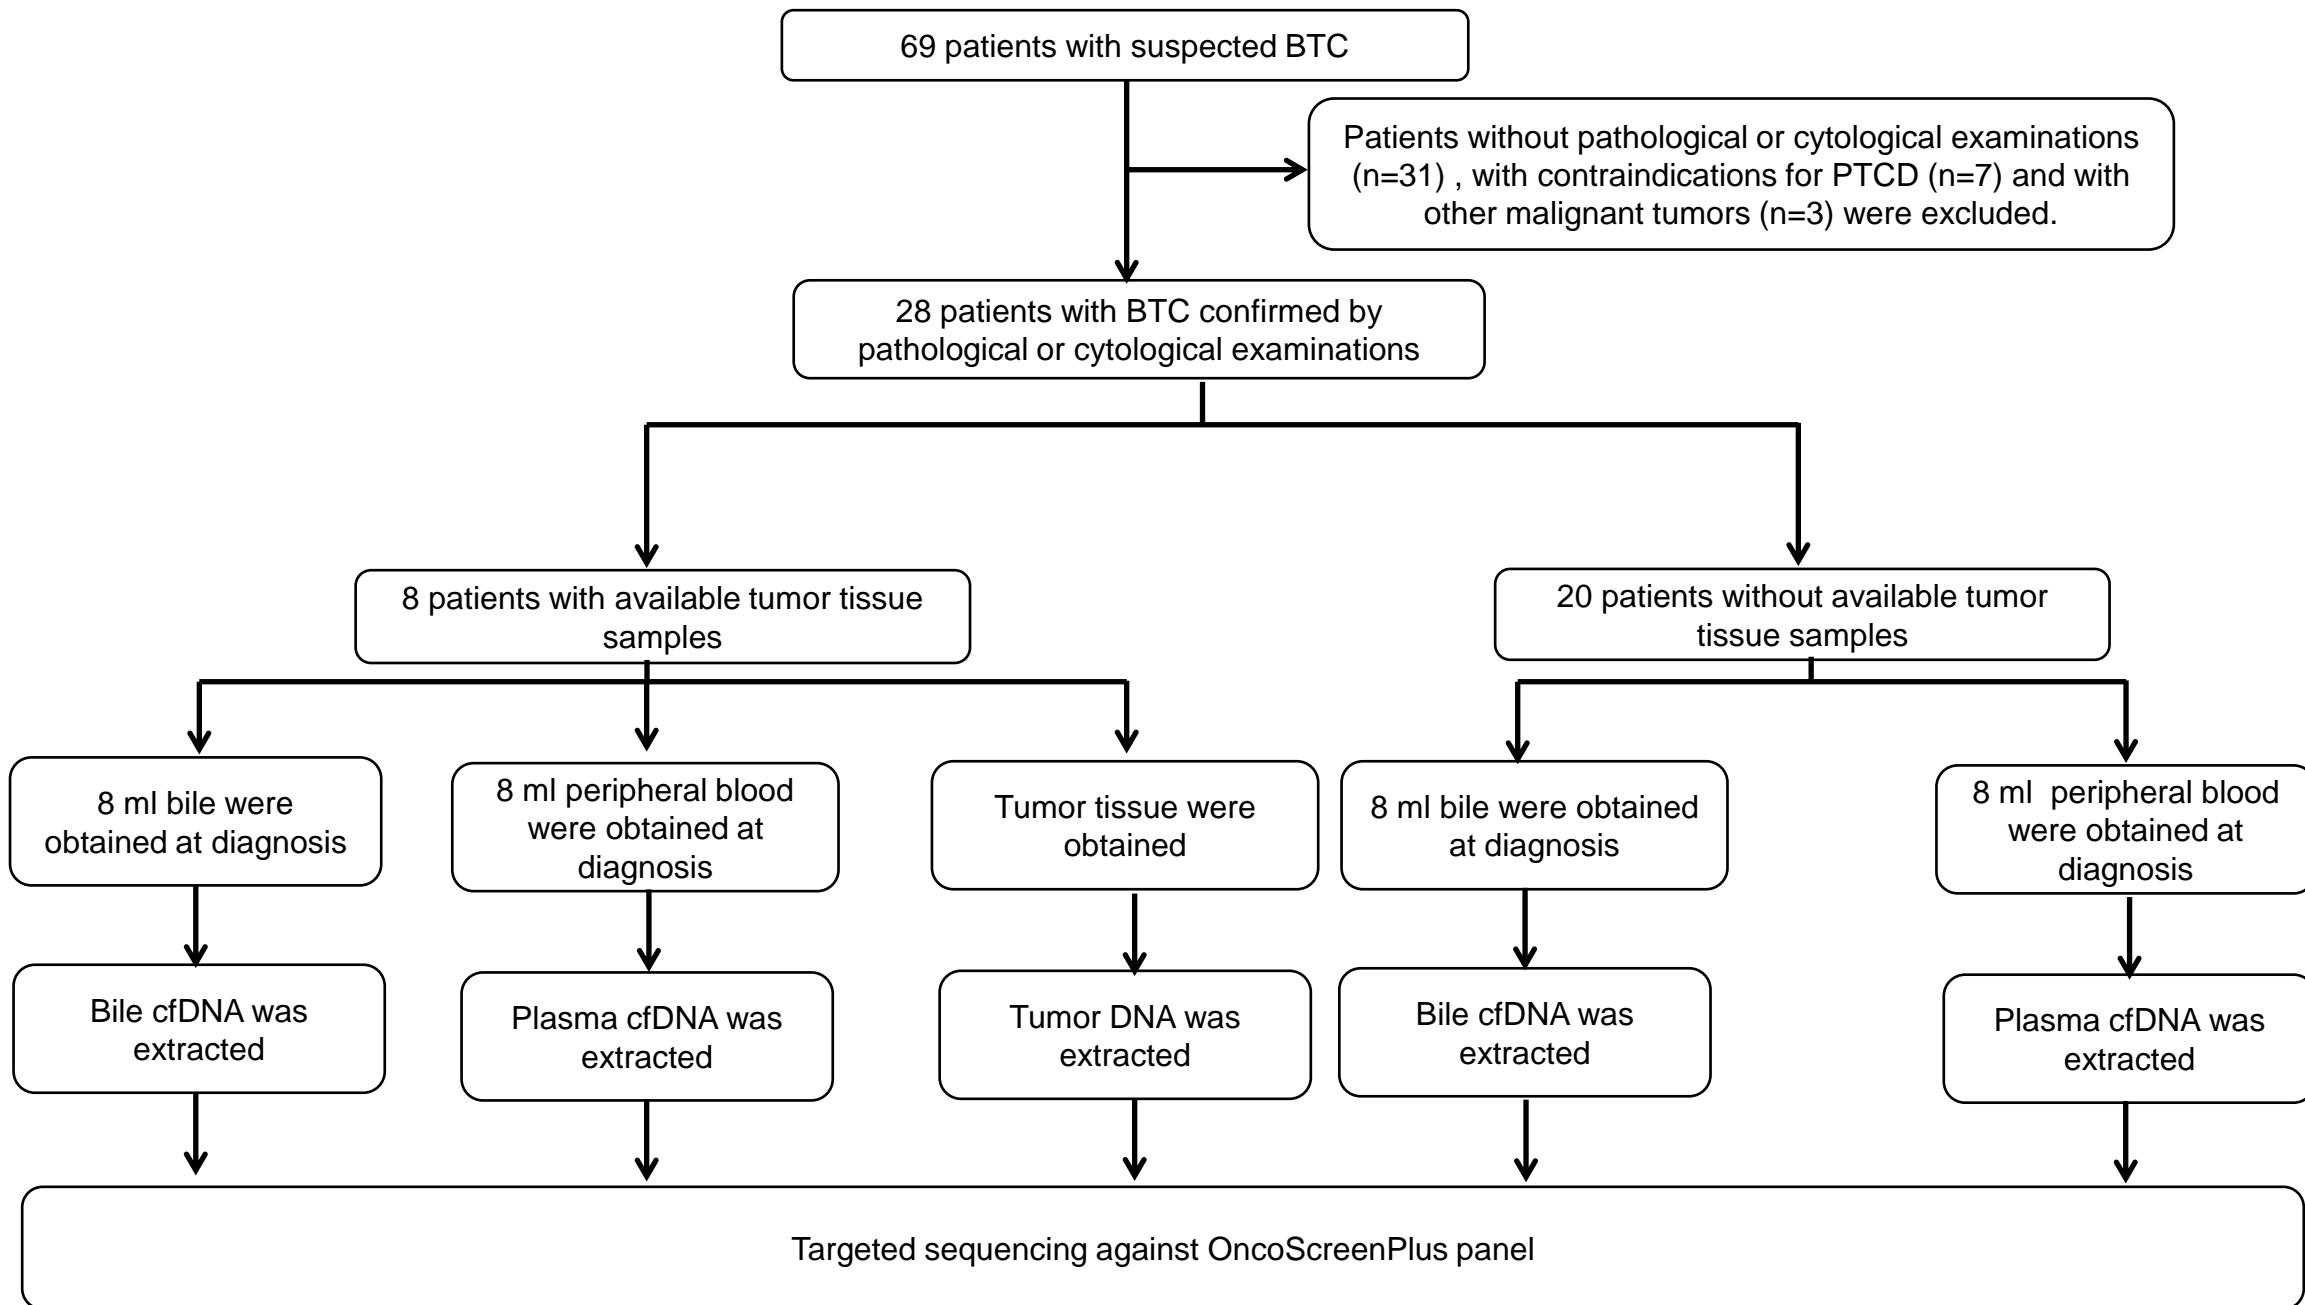

Supplement: mmc1.pdf [file mmc1.pdf]

A

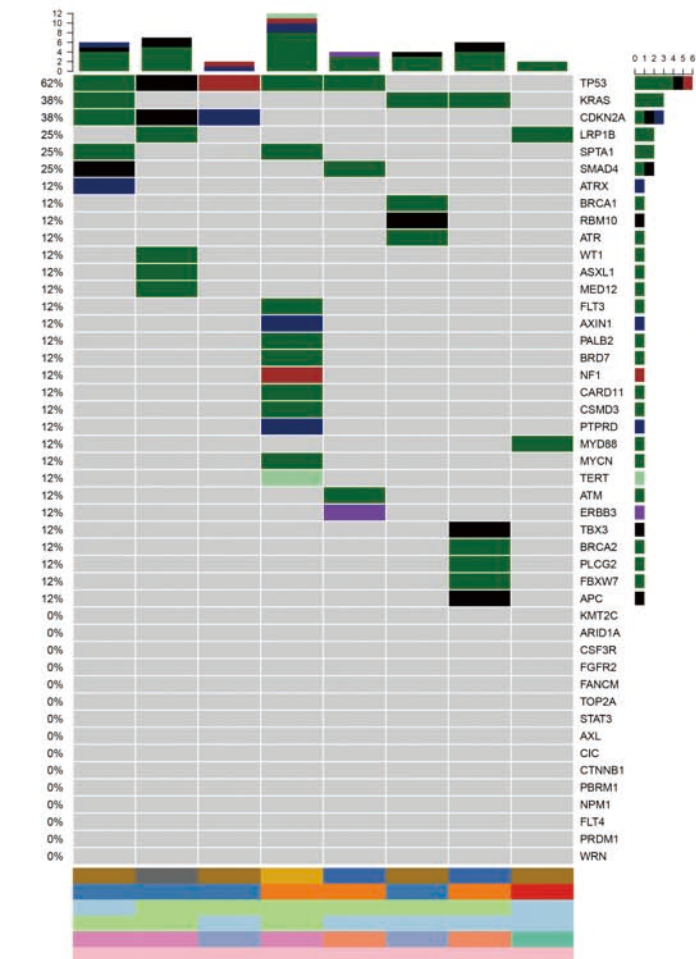

B

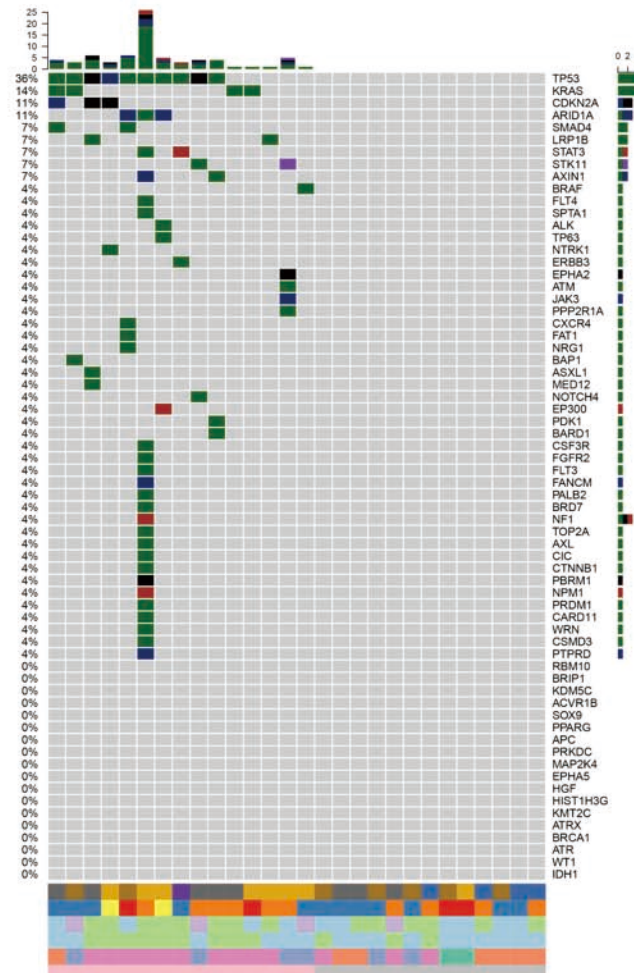

C

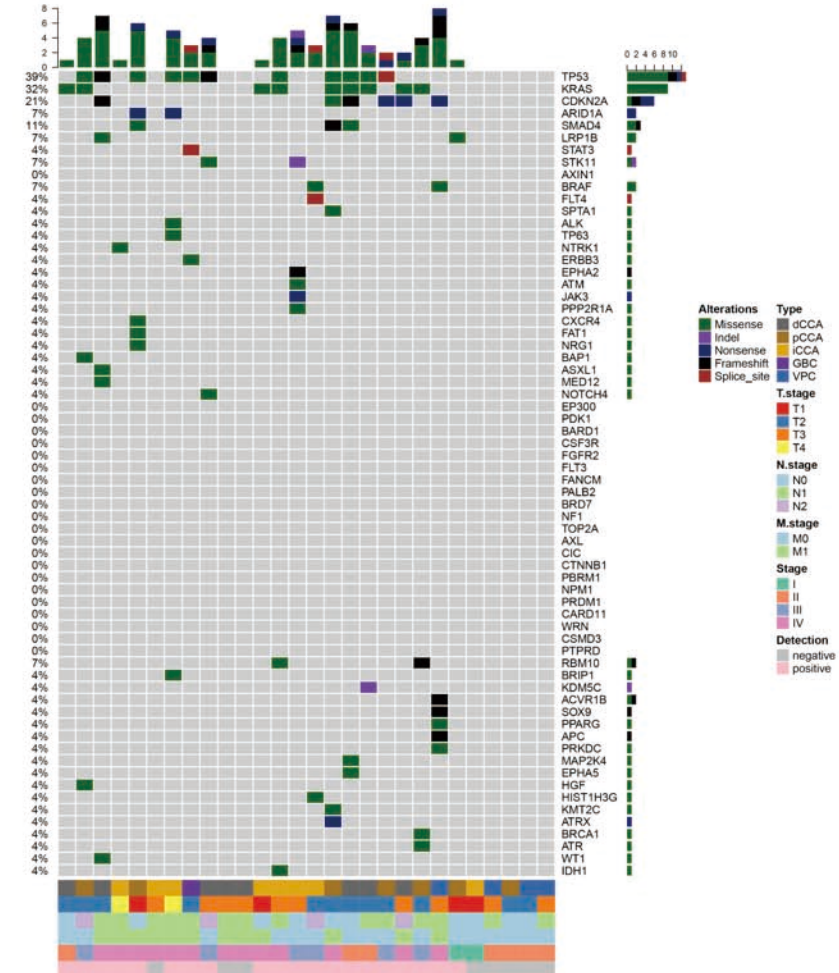

Supplement: mmc2.pdf [file mmc2.pdf]

**A**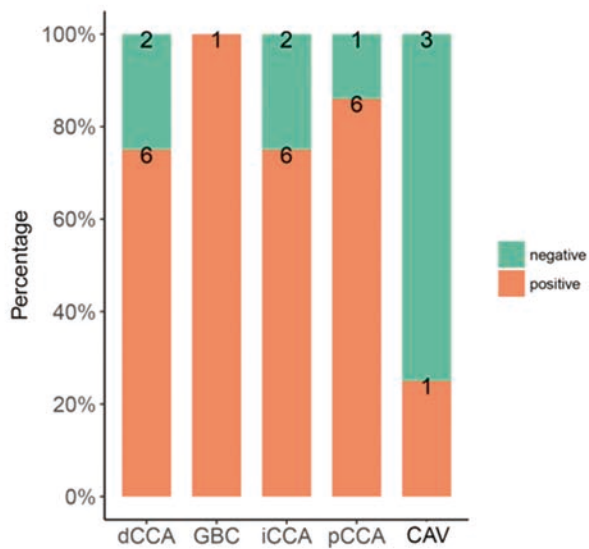**B**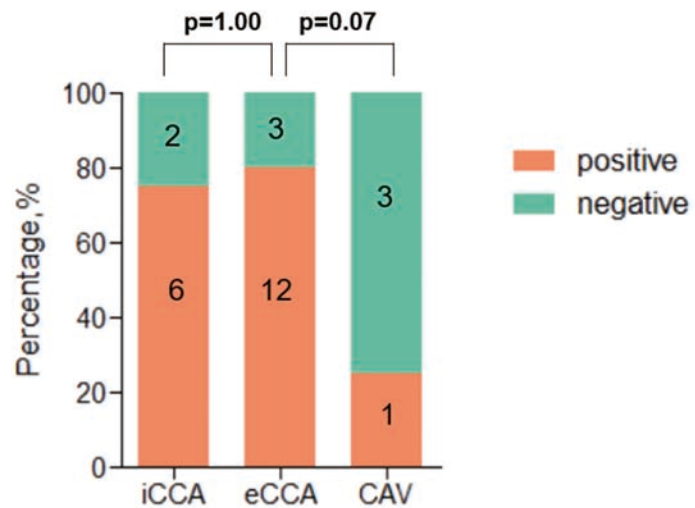**C**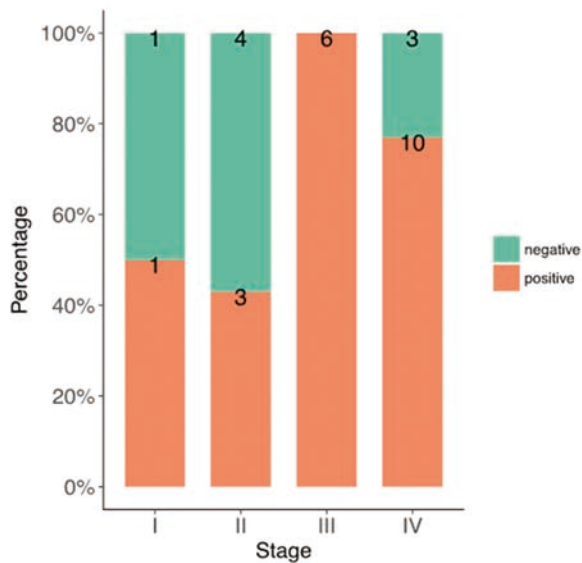**D**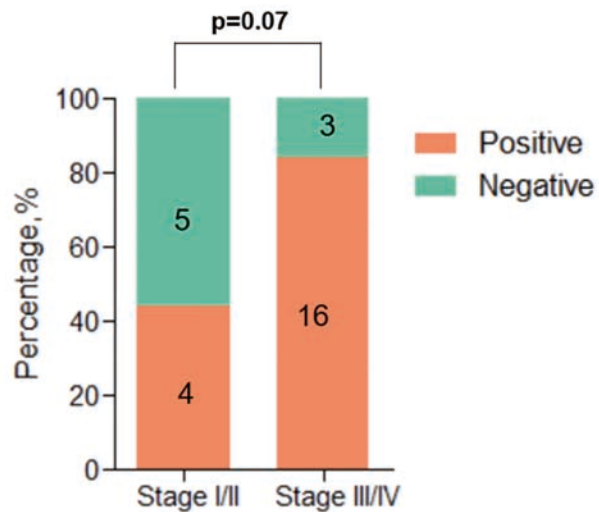

Supplement: mmc3.pdf [file mmc3.pdf]
